# Supplementary material for: Vaccinated COVID-19 Index Cases Are Less Likely to Transmit SARS-CoV-2 to Their Household Contacts: A Cohort Study
Source: MDPI journal article supplement (doi:10.3390/vaccines12030240), 2024-02-26
Supplement: s1 [file s1]

**Supplementary Materials:**

**Table S1.** Household infection transmission effects of vaccination and previous SARS-CoV-2 infection history in index cases and contacts

| <b>Variable</b>                                             | <b>Infected contact<br/>n=87</b> | <b>Non-infected contact<br/>n=147</b> | <b>OR</b> | <b>95% CI</b> | <b>P value</b> |
|-------------------------------------------------------------|----------------------------------|---------------------------------------|-----------|---------------|----------------|
| <b>Index case vaccination y/o previous COVID-19 history</b> |                                  |                                       |           |               |                |
| No                                                          | 9                                | 6                                     | 1.00      | Reference     |                |
| Vaccination without previous COVID-19 history               | 52                               | 84                                    | 0.41      | 0.14-1.23     | 0.111          |
| previous COVID-19 history without vaccination               | 3                                | 1                                     | 2.00      | 0.16-24.07    | 0.584          |
| Vaccination and previous COVID-19 history                   | 23                               | 56                                    | 0.27      | 0.08-0.86     | 0.026          |
| <b>Contact vaccination y/o previous COVID-19 history</b>    |                                  |                                       |           |               |                |
| No                                                          | 3                                | 5                                     | 1.00      | Reference     |                |
| Vaccination without previous COVID-19 history               | 54                               | 61                                    | 1.47      | 0.34-6.46     | 0.605          |
| previous COVID-19 history without vaccination               | 2                                | 6                                     | 0.56      | 0.06-4.76     | 0.591          |
| Vaccination and previous COVID-19 history                   | 28                               | 75                                    | 0.66      | 0.13-2.78     | 0.534          |

CI: confidence interval; OR: odds ratio.

**Supplementary Table S2.** Multivariate logistic regression of factors associated with SARS-CoV-2 transmission to household contacts

| Variable                                                    | aOR  | 95% CI     | P value |
|-------------------------------------------------------------|------|------------|---------|
| <b>Age group (years)</b>                                    |      |            |         |
| 0-17                                                        | 1.00 | Reference  |         |
| 18-44                                                       | 1.42 | 0.47-4.31  | 0.535   |
| 45-64                                                       | 1.15 | 0.38-3.45  | 0.798   |
| ≥65                                                         | 3.42 | 1.01-11.57 | 0.048   |
| <b>Sex</b>                                                  |      |            |         |
| Male                                                        | 0.68 | 0.36-1.29  | 0.233   |
| Female                                                      | 1.00 | Reference  |         |
| <b>Index case vaccination y/o previous COVID-19 history</b> |      |            |         |
| No                                                          | 1.00 | Reference  |         |
| Vaccination without previous COVID-19 history               | 0.20 | 0.05-0.76  | 0.018   |
| previous COVID-19 history without vaccination               | 1.00 | 0.07-13.92 | 0.995   |
| Vaccination and previous COVID-19 history                   | 0.23 | 0.06-0.87  | 0.030   |
| <b>Contact vaccination y/o previous COVID-19 history</b>    |      |            |         |
| No                                                          | 1.00 | Reference  |         |
| Vaccination without previous COVID-19 history               | 1.01 | 0.16-6.09  | 0.989   |
| previous COVID-19 history without vaccination               | 0.42 | 0.03-5.07  | 0.495   |
| Vaccination and previous COVID-19 history                   | 0.41 | 0.07-2.41  | 0.324   |
| <b>Smoker</b>                                               |      |            |         |
| Yes                                                         | 2.31 | 1.17-4.54  | 0.015   |
| No                                                          | 1.00 | Reference  |         |
| <b>Cohabitation with partner</b>                            |      |            |         |
| Yes                                                         | 2.3  | 1.06-5.05  | 0.034   |
| No                                                          | 1.00 | Reference  |         |

aOR: adjusted odds ratio (according to the remaining variables in the table); CI: confidence interval.
